# Supplementary material
Source: Springer Nature journal article supplement (https://www.springermedizin.de/resource/supplementary/12946_2010_148_MOESM1_ESM.pdf/9555266)

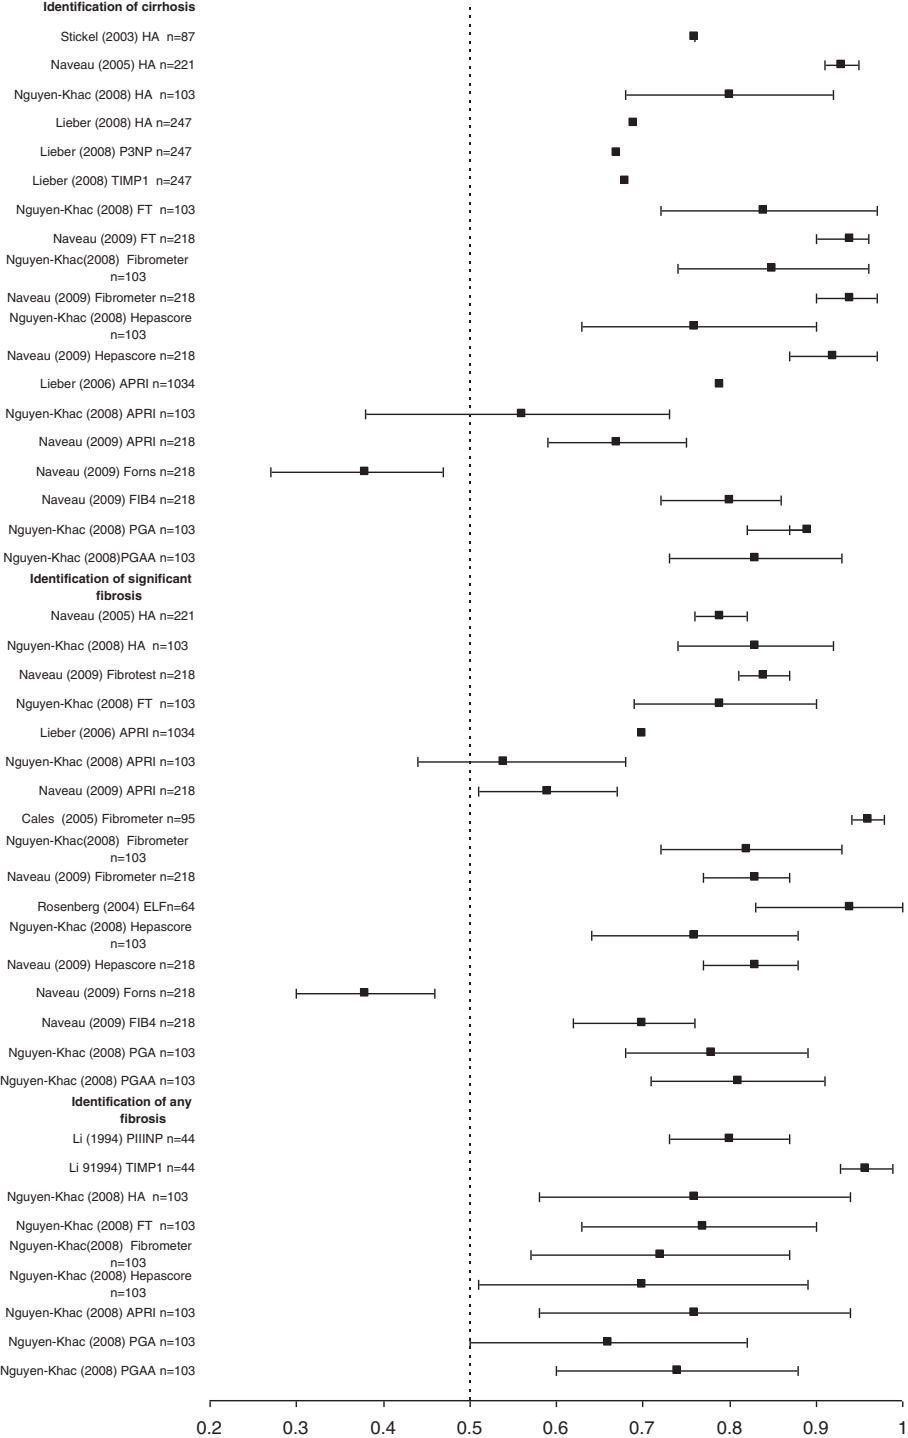

Supplement: MOESM1 [file 9555266]
